# Supplementary material for: Detection and removal of mercury and lead ions by using gold nanoparticle-based gel membrane
Source: Royal Society of Chemistry journal article supplement (doi:10.1039/c2ay05872c), 2012-01-01
Supplement: c2ay05872c.pdf [file c2ay05872c.pdf]

## Supplementary Information

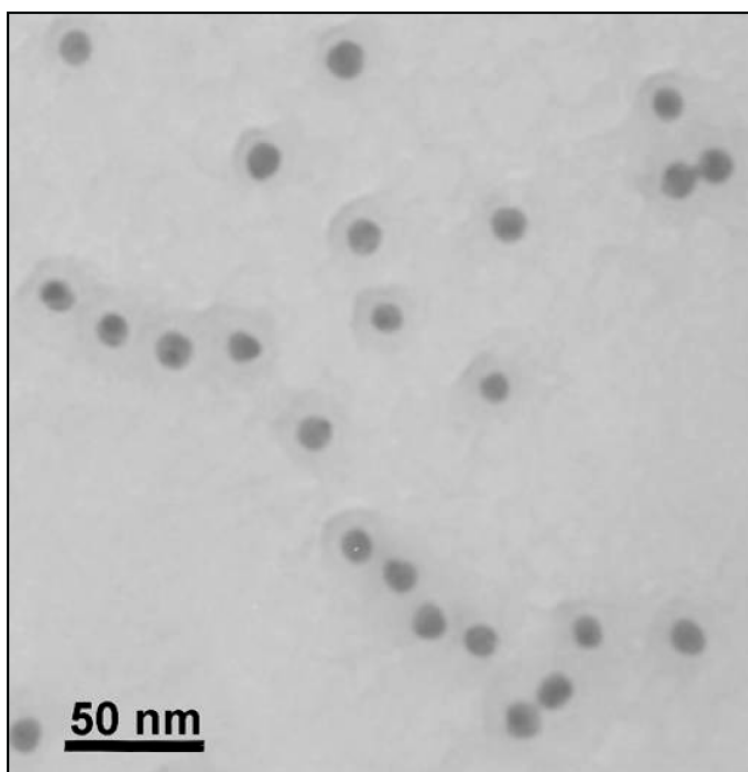

**Fig. S1** Transmission electron microscopy (TEM) image of BSA-protected R6G/MPA-Au NPs.

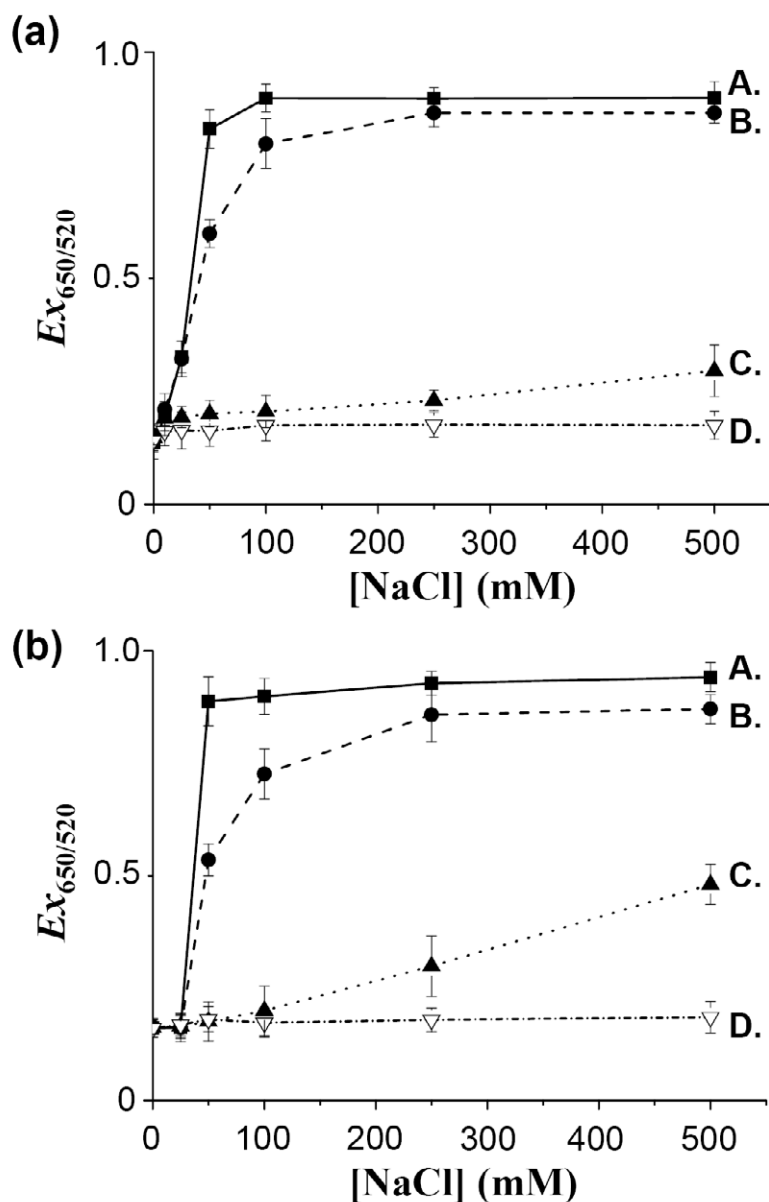

**Fig. S2** Effect of the concentration ratio of BSA to Au NPs ( $[BSA]/[Au\ NPs]$ ) on the stability of the (a) R6G/MPA-Au NPs@BSA (0.6 nM) and (b) 2-ME/S<sub>2</sub>O<sub>3</sub><sup>2-</sup>-Au NPs@BSA (1.5 nM) in 5 mM sodium phosphate (pH 5.0) and 5 mM glycine-NaOH (pH 10.0) buffer containing NaCl (0–500 mM), respectively. The  $[BSA]/[Au\ NPs]$  ratios in (a) were (A) 0, (B) 10, (C) 100, and (D) 1000; in (b) they were (A) 0, (B) 10, (C) 50, and (D) 100. Error bars are standard deviation values across four repetitive experiments.

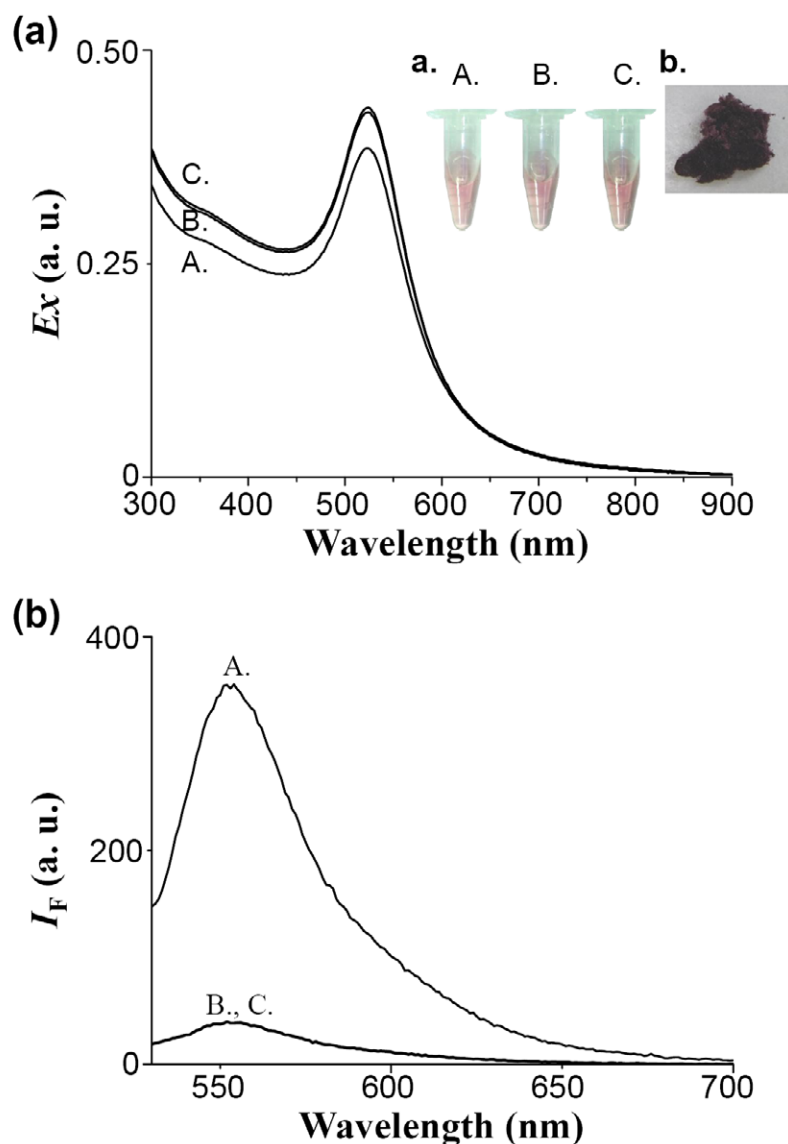

**Fig. S3** (a) UV-vis absorption spectra of (A) Au NPs (3.0 nM), (B) R6G/MPA-Au NPs@BSA (3.0 nM), and (C) a re-suspended lyophilized powder of R6G/MPA-Au NPs@BSA (3.0 nM) in 5 mM sodium phosphate (pH 5.0) solution. Inset a: Photographic images of the Au NP solutions. Inset b: Photograph of the lyophilized powder of R6G/MPA-Au NPs@BSA. (b) Fluorescence spectra of (A) R6G (300 nM), (B) R6G/MPA-Au NPs@BSA (3.0 nM), and (C) a re-suspended lyophilized powder of R6G/MPA-Au NPs@BSA (3.0 nM) in 5 mM sodium phosphate (pH 5.0). Other conditions were the same as those described in Fig. S2.

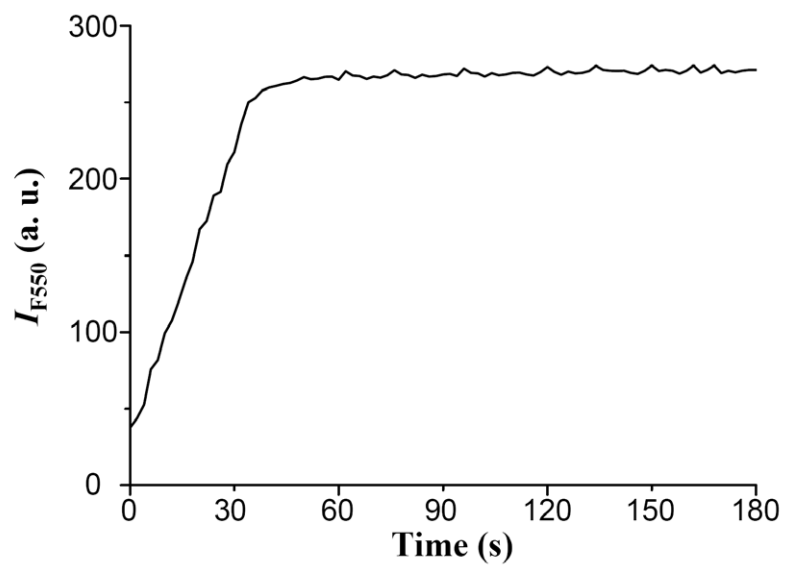

**Fig. S4** Time course measurement of fluorescence intensity at 550 nm ( $I_{F550}$ ) for R6G/MPA-Au NPs@BSA upon the addition of  $Hg^{2+}$  (10  $\mu M$ ). Other conditions were the same as those described in Fig. 1.

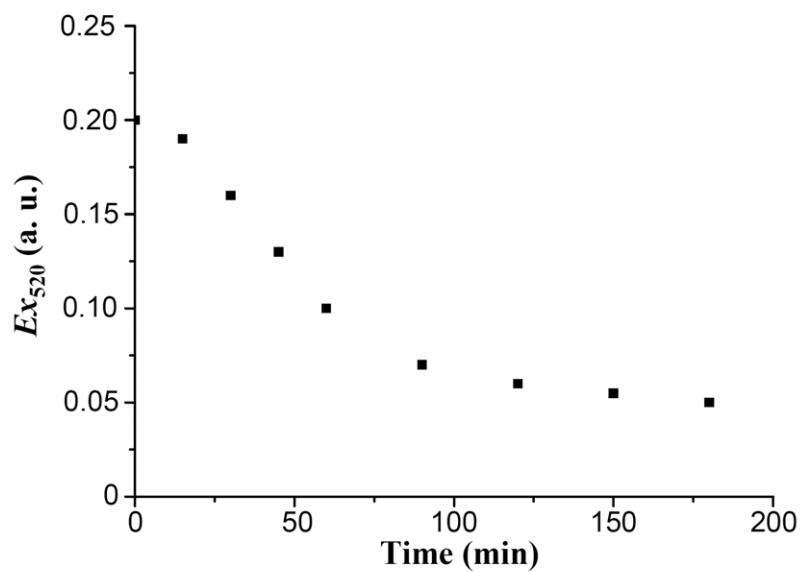

**Fig. S5** Time-course measurement of the values of extinction coefficients at 520 nm ( $Ex_{520}$ ) of the 2-ME/S<sub>2</sub>O<sub>3</sub><sup>2-</sup>-Au NPs@BSA in the presence of Pb<sup>2+</sup> (1.0 μM). Other conditions were the same as those described in Fig. 2.

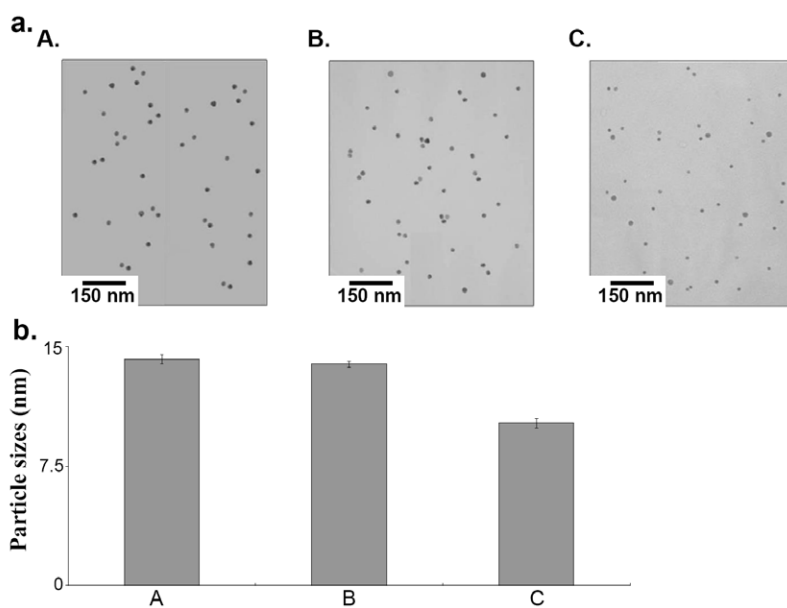

**Fig. S6** (a) Transmission electron microscopy (TEM) images and (b) average particle sizes of the (A) BSA-capped Au NPs, (B) 2-ME/S<sub>2</sub>O<sub>3</sub><sup>2-</sup>-Au NPs@BSA, and (C) 2-ME/S<sub>2</sub>O<sub>3</sub><sup>2-</sup>-Au NPs@BSA and PbCl<sub>2</sub> (1.0 μM). The average particle sizes were obtained from counts of 100 particles in the TEM images. Other conditions were the same as those described in Fig. 2.

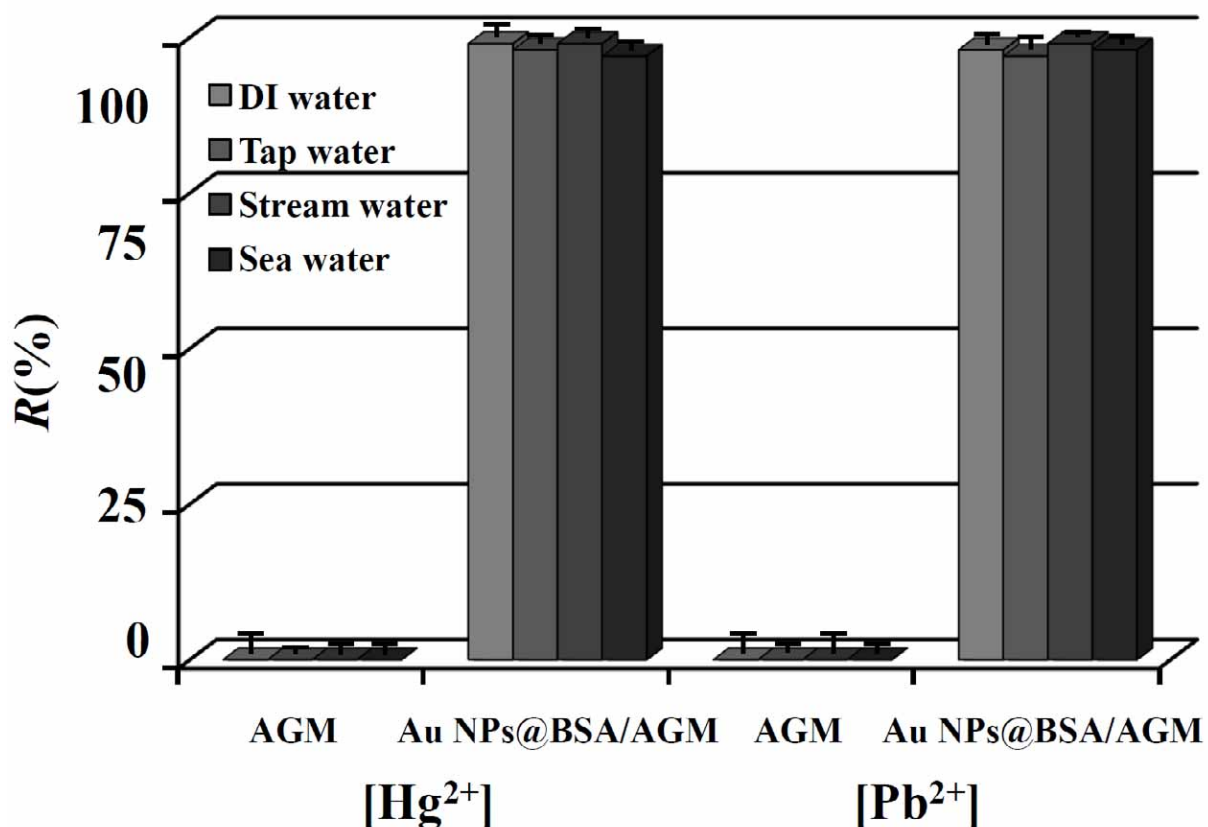

**Fig. S7** Removal efficiency ( $R$ ) of  $Hg^{2+}$  ions ( $1 \mu M$ ) or  $Pb^{2+}$  ions ( $1 \mu M$ ) in 10 mL DI water or 2-fold diluted tap, stream or sea waters by bared agarose gel membrane (AGM) or Au NPs@BSA-trapped agarose gel membrane (Au NPs@BSA/AGM). The percentage of metal ions removed by the adsorbents was calculated as follows:  $R(\%) = (M_0 - M_{eq})/M_0 \times 100$ , where  $R$  is the removal efficiency of the metals ions,  $M_0$  is the initial ion concentration, and  $M_{eq}$  is the ion concentration at equilibrium.

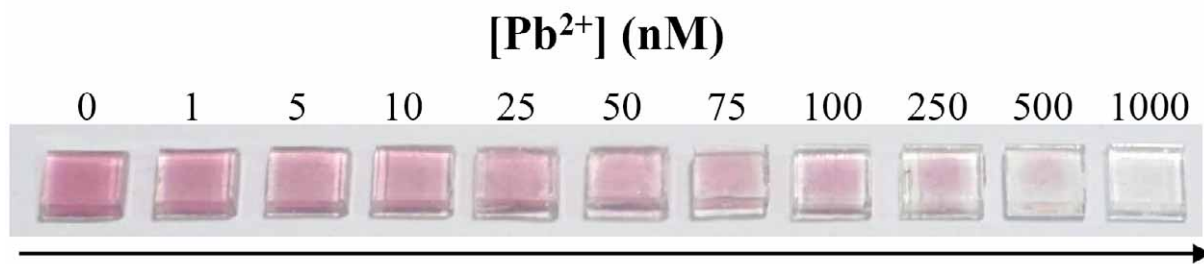

**Fig. S8** The colors of 2-ME/S<sub>2</sub>O<sub>3</sub><sup>2-</sup>-Au NPs@BSA/AGM probe for detection of Pb<sup>2+</sup> ions (0 – 1 μM). Other conditions were the same as those described in Fig. 6a.
